# Supplementary material for: Catalytic mechanism for selective hydrogen production based on formate decomposition with polyvinylpyrrolidone-dispersed platinum nanoparticles
Source: Royal Society of Chemistry journal article supplement (doi:10.1039/d0se00363h), 2020-01-01
Supplement: d0se00363h1.pdf [file d0se00363h1.pdf]

## Supporting information

### The extended X-ray absorption fine structure (EXAFS) and X-ray absorption near edge structure (XANES) spectra measurements

EXAFS measurements at the Pt  $L_3$ -edge were carried out at BL5S1 of Aichi synchrotron radiation center (proposal number 201803007) with a Si(111) double-crystal monochromator in the transmittance mode at room temperature. Fig. S1 shows the

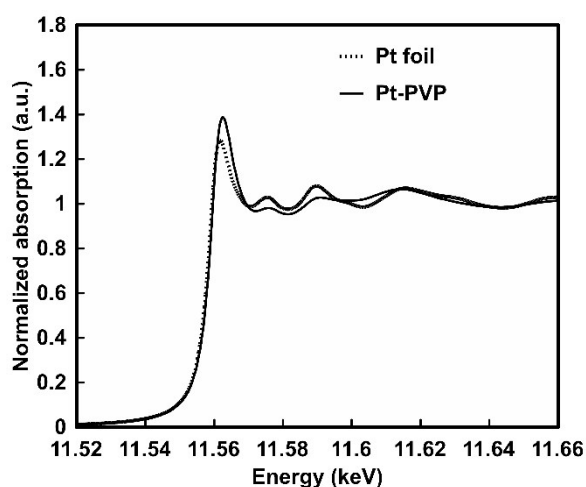

XANES spectra at Pt  $L_3$  -edge of the Pt-PVP, compared to Pt foil standard.

**Fig. S1.** Pt  $L_3$  -edge XANES spectra of the Pt foil, Pt-PVP.

The EXAFS oscillations (a) and corresponding Fourier transform (b) of the Pt-PVP and Pt foil are shown in Fig. S2.

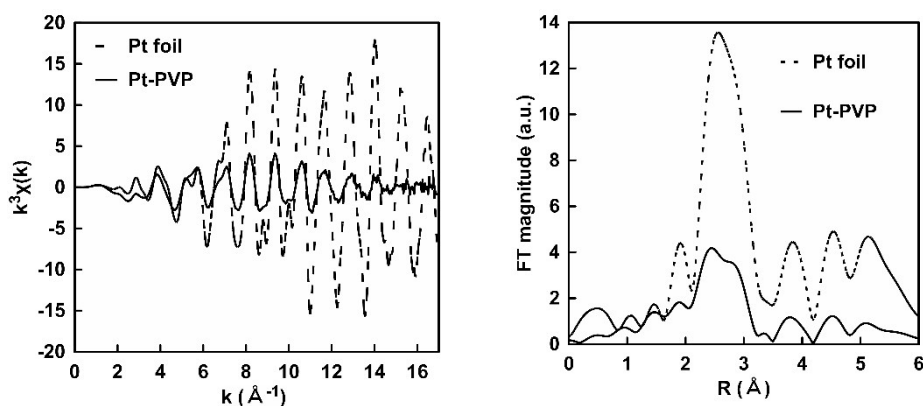

**Fig. S2.** Pt  $L_3$  -edge EXAFS spectrum (a) and corresponding radial structure function obtained by Fourier transform of EXAFS spectrum (b) of the Pt-PVP and Pt foil.



### Acetaldehyde was produced from ethanol with Pt-PVP

95.5 % Ethanol (3 mL) was added in a vial (13 mL), then the air in the vial was removed by bubbling Ar for 15 min. Pt-PVP (0.1 mL) was added there with a syringe, and reacted at 30.5 °C with a thermostatic chamber. Acetaldehyde was detected with gas chromatograph (GC-2014, SHIMADZU Corporation) with a TCD detector. Activation charcoal column (column length: 3 mm I.D.  $\times$  2 m) was equipped for detecting it. The temperature of injection, column and detector were 100.0, 70.0 and 100.0 °C respectively. Ar gas was used by carrier gas and the flow rate was 30.0 mL/min. Figs. S3(a) and (b) show the gas chromatography charts of ethanol and acetaldehyde, respectively.

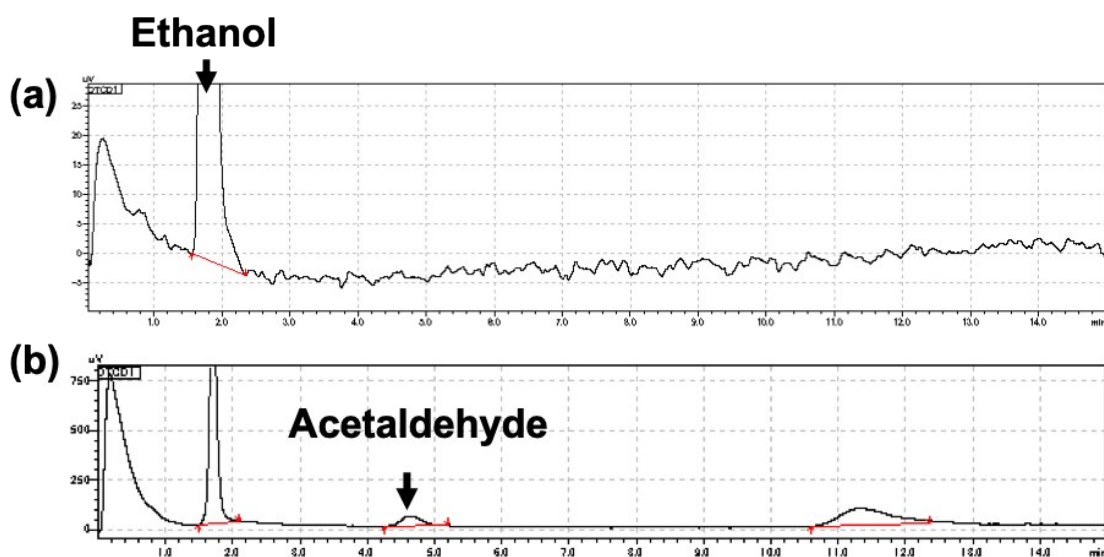

**Fig. S3.** The gas chromatography charts of ethanol (a) and acetaldehyde (b), respectively.

Fig. S4 shows the chart of gas chromatographic analysis of the gas phase in the system of Pt-PVP and ethanol after 3 and 5 h incubation.

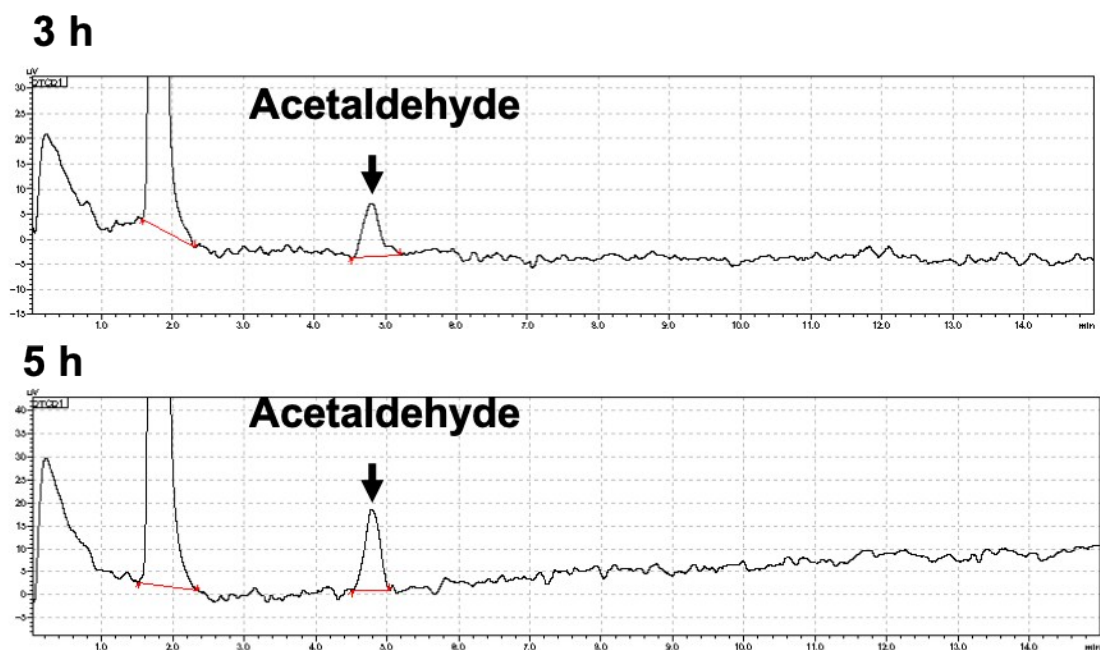

**Fig. S4.** The gas chromatography charts for analysis of the gas phase in the system of Pt-PVP and ethanol after 3 and 5 h incubation.

From Fig. S4, the peak attributed to acetaldehyde production increased with increasing incubation time.
